# Supplementary material
Source: PubMed Central journal article supplement (PMC9094632)
Supplement: NIHMS1789639-supplement-SI.pdf [file NIHMS1789639-supplement-SI.pdf]

# Choroid Plexus Volume is Negatively Associated with Levels of CSF Proteins

Ehsan Tadayon, M.D.<sup>1</sup>, Alvaro Pascual-Leone, M.D., Ph.D.<sup>2,3</sup>, Daniel Press,  
M.D.<sup>1</sup>, Emiliano Santarnecchi, Ph.D.<sup>1-3</sup>, for the Alzheimer's Disease  
Neuroimaging Initiative\*

<sup>1</sup> *Berenson-Allen Center for Non-Invasive Brain Stimulation and Division for Cognitive Neurology, Beth Israel Deaconess Medical Center, Harvard Medical School, Boston, MA, USA*

<sup>2</sup> *Institut Universitari de Neurorehabilitacio Guttmann, Badalona, Barcelona, Spain*

<sup>3</sup> *Hinda and Arthur Marcus Institute for Aging Research and Center for Memory Health, Hebrew SeniorLife, Department of Neurology, Harvard Medical School, Boston, MA, USA*

\*Data used in preparation of this article were obtained from the Alzheimer's Disease Neuroimaging Initiative (ADNI) database (adni.loni.usc.edu). As such, the investigators within the ADNI contributed to the design and implementation of ADNI and/or provided data but did not participate in analysis or writing of this report. A complete listing of ADNI investigators can be found at:

[http://adni.loni.usc.edu/wpcontent/uploads/how\\_to\\_apply/ADNI\\_Acknowledgement\\_List.pdf](http://adni.loni.usc.edu/wpcontent/uploads/how_to_apply/ADNI_Acknowledgement_List.pdf)

**Supplemental Information:** 3 Tables, 3 Figures

**Financial disclosures** All authors report no conflict of interest.

| PPMI                    |               |                   |               |                  |              |                   |               |                   |
|-------------------------|---------------|-------------------|---------------|------------------|--------------|-------------------|---------------|-------------------|
| Variables               | t-tau         |                   | p-tau         |                  | A $\beta$    |                   | $\alpha$ -syn |                   |
|                         | coef          | p                 | coef          | p                | coef         | p                 | coef          | p                 |
| Age                     | 0.009         | <0.001            | 0.003         | -                | -0.001       | -                 | 0.003         | 0.15              |
| Sex (male)              | -0.064        | -                 | 0.03          | -                | -0.05        | -                 | 0.01          | 0.85              |
| <b>ChP volume (ml)</b>  | <b>-0.19</b>  | <b>&lt; 0.001</b> | <b>-0.1</b>   | <b>&lt; 0.01</b> | <b>-0.16</b> | <b>&lt; 0.001</b> | <b>-0.19</b>  | <b>&lt; 0.001</b> |
| Ventricular volume (ml) | -0.003        | < 0.01            | -0.004        | < 0.01           | -0.002       | < 0.001           | -0.004        | < 0.001           |
| APOE $\epsilon$ 4       | -0.003        | -                 | 0.03          | -                | -0.15        | < 0.001           | -0.015        | -                 |
| Cortical volume (ml)    | 0.0007        | -                 | 0.0007        | -                | 0.0004       | -                 | -0.0002       | -                 |
| Group PD                | -0.12         | -                 | -0.12         | -                | 0.005        | -                 | -0.12         | -                 |
| ADNI                    |               |                   |               |                  |              |                   |               |                   |
| Age                     | 0.008         | < 0.01            | 0.009         | < 0.01           | -0.012       | < 0.001           | -             | -                 |
| Sex (male)              | -0.065        | -                 | -0.05         | -                | -0.12        | < 0.01            | -             | -                 |
| <b>ChP volume (ml)</b>  | <b>-0.098</b> | <b>&lt; 0.01</b>  | <b>-0.092</b> | <b>&lt; 0.01</b> | <b>-0.23</b> | <b>&lt; 0.001</b> | -             | -                 |
| Ventricular volume (ml) | -0.0023       | -                 | -0.001        | -                | -0.013       | < 0.001           | -             | -                 |
| APOE $\epsilon$ 4       | 0.27          | < 0.001           | 0.3           | < 0.001          | -0.47        | < 0.001           | -             | -                 |
| Cortical volume (ml)    | -0.0013       | < 0.01            | -0.001        | < 0.01           | 0.0016       | < 0.01            | -             | -                 |
| Group SMC               | -0.013        | -                 | -0.017        | -                | -0.0005      | -                 | -             | -                 |
| EMCI                    | 0.031         | -                 | 0.032         | -                | -0.15        | 0.01              | -             | -                 |
| LMCI                    | 0.17          | < 0.001           | 0.17          | < 0.001          | -0.37        | < 0.001           | -             | -                 |
| AD                      | 0.45          | < 0.001           | 0.45          | < 0.001          | -0.64        | < 0.001           | -             | -                 |

**Supplementary Table 1: Univariate analysis of association between CSF protein levels and independent variables including age, sex, ChP volume, ventricular volume, APOE $\epsilon$ 4, cortical volume, and group. Note:** PPMI: Parkinson's Progression Markers Initiative; ADNI: Alzheimer's Disease Neuroimaging Initiative; ChP: choroid plexus; APOE $\epsilon$ 4: apolipoprotein E  $\epsilon$ 4 allele; PD: Parkinson's disease; AD: Alzheimer's disease; SMC: significant memory concern; EMCI: early-mild cognitive impairment; LMCI: late-mild cognitive impairment; t-tau: total-tau; p-tau: phosphorylated-tau; A $\beta$ : amyloid- $\beta$ ;  $\alpha$ -syn:  $\alpha$ -synuclein

| <b>PPMI</b>             |               |                  |               |                  |                            |                  |                                |                  |
|-------------------------|---------------|------------------|---------------|------------------|----------------------------|------------------|--------------------------------|------------------|
|                         | <b>t-tau</b>  |                  | <b>p-tau</b>  |                  | <b>A<math>\beta</math></b> |                  | <b><math>\alpha</math>-syn</b> |                  |
|                         | <b>coef</b>   | <b>p</b>         | <b>coef</b>   | <b>p</b>         | <b>coef</b>                | <b>p</b>         | <b>coef</b>                    | <b>p</b>         |
| Age                     | 0.018         | < 0.01           | 0.013         | < 0.01           | 0.002                      | -                | 0.010                          | < 0.01           |
| Sex (male)              | -0.004        | -                | 0.041         | -                | -0.016                     | -                | 0.106                          | -                |
| APOE $\epsilon$ 4       | 0.023         | -                | 0.018         | -                | -0.175                     | < 0.01           | -0.010                         | -                |
| <b>ChP volume (ml)</b>  | <b>-0.248</b> | <b>&lt; 0.01</b> | <b>-0.115</b> | <b>-</b>         | <b>-0.111</b>              | <b>&lt; 0.01</b> | <b>-0.250</b>                  | <b>&lt; 0.01</b> |
| Cortical volume (ml)    | 0.000         | -                | 0.001         | -                | 0.001                      | 0.01             | 0.000                          | -                |
| Ventricular volume (ml) | -0.003        | -                | -0.007        | 0.01             | -0.001                     | -                | -0.003                         | -                |
| TBV(ml)                 | 0.000         | -                | 0.000         | -                | 0.000                      | -                | 0.000                          | -                |
| Group PD                | -0.172        | < 0.01           | -0.142        | -                | -0.004                     | -                | -0.151                         | < 0.01           |
| <b>ADNI</b>             |               |                  |               |                  |                            |                  |                                |                  |
| Age                     | 0.016         | < 0.01           | 0.017         | < 0.01           | -0.005                     | -                |                                |                  |
| Sex (male)              | -0.061        | -                | -0.057        | -                | -0.073                     | -                |                                |                  |
| APOE $\epsilon$ 4       | 0.202         | < 0.01           | 0.251         | -                | -0.421                     | < 0.01           |                                |                  |
| <b>ChP volume (ml)</b>  | <b>-0.196</b> | <b>&lt; 0.01</b> | <b>-0.207</b> | <b>&lt; 0.01</b> | <b>-0.096</b>              | <b>-</b>         |                                |                  |
| Cortical volume (ml)    | -0.001        | -                | -0.001        | -                | 0.001                      | -                |                                |                  |
| Ventricular volume (ml) | -0.004        | < 0.01           | -0.004        | < 0.01           | -0.004                     | < 0.01           |                                |                  |
| TBV (ml)                | 0.001         | < 0.01           | 0.001         | < 0.01           | 0.000                      | -                |                                |                  |
| Group SMC               | -0.016        | -                | -0.021        | -                | -0.014                     | -                |                                |                  |
| EMCI                    | 0.046         | -                | 0.060         | -                | -0.088                     | -                |                                |                  |
| LMCI                    | 0.185         | < 0.01           | 0.224         | < 0.01           | -0.234                     | < 0.01           |                                |                  |
| AD                      | 0.435         | < 0.01           | 0.490         | < 0.01           | -0.334                     | < 0.01           |                                | -                |

**Supplementary Table 2: Adding total brain volume (TBV) as a covariate to multiple regression analyses.**

| <b>PPMI</b>          |               |                  |               |                  |                            |                  |                                |                  |
|----------------------|---------------|------------------|---------------|------------------|----------------------------|------------------|--------------------------------|------------------|
|                      | <b>t-tau</b>  |                  | <b>p-tau</b>  |                  | <b>A<math>\beta</math></b> |                  | <b><math>\alpha</math>-syn</b> |                  |
|                      | <b>coef</b>   | <b>p</b>         | <b>coef</b>   | <b>p</b>         | <b>coef</b>                | <b>p</b>         | <b>coef</b>                    | <b>p</b>         |
| Age                  | 0.019         | < 0.01           | 0.014         | < 0.01           | 0.002                      | -                | 0.012                          | < 0.01           |
| Sex (male)           | -0.019        | -                | 0.098         | -                | 0.013                      | -                | 0.069                          | -                |
| APOE $\epsilon$ 4    | 0.024         | -                | 0.021         | -                | -0.171                     | < 0.01           | -0.009                         | -                |
| <b>ChP /TBV (ml)</b> | <b>-3.707</b> | <b>&lt; 0.01</b> | <b>-1.949</b> | <b>-</b>         | <b>-1.855</b>              | <b>&lt; 0.01</b> | <b>-3.667</b>                  | <b>&lt; 0.01</b> |
| Cortical/TBV (ml)    | 0.938         | -                | 1.584         | -                | 1.821                      | -                | 0.170                          | -                |
| Ventricle/TBV (ml)   | -6.885        | -                | -11.835       | < 0.01           | -1.365                     | -                | -8.314                         | 0.010            |
| Group PD             | -0.176        | < 0.01           | -0.128        | -                | 0.003                      | -                | -0.162                         | < 0.01           |
| <b>ADNI</b>          |               |                  |               |                  |                            |                  |                                |                  |
| Age                  | 0.016         | < 0.01           | 0.018         | < 0.01           | -0.005                     | -                |                                |                  |
| Sex (male)           | -0.066        | -                | -0.057        | -                | -0.051                     | -                |                                |                  |
| APOE $\epsilon$ 4    | 0.200         | < 0.01           | 0.249         | < 0.01           | -0.424                     | < 0.01           |                                |                  |
| <b>ChP /TBV (ml)</b> | <b>-2.940</b> | <b>&lt; 0.01</b> | <b>-3.162</b> | <b>&lt; 0.01</b> | <b>-1.579</b>              | <b>0.010</b>     |                                |                  |
| Cortical/TBV (ml)    | -1.401        | -                | -1.592        | -                | 0.751                      | -                |                                |                  |
| Ventricle/TBV (ml)   | -6.684        | < 0.01           | -7.185        | < 0.01           | -6.553                     | < 0.01           |                                |                  |
| Group SMC            | -0.015        | -                | -0.018        | -                | -0.007                     | -                |                                |                  |
| EMCI                 | 0.046         | -                | 0.060         | -                | -0.088                     | -                |                                |                  |
| LMCI                 | 0.187         | < 0.01           | 0.226         | < 0.01           | -0.235                     | < 0.01           |                                |                  |
| AD                   | 0.440         | < 0.01           | 0.494         | < 0.01           | -0.336                     | < 0.01           |                                | -                |

**Supplementary table 3: Multiple regression analyses using normalized brain volumes (by total brain volume (TBV)).**

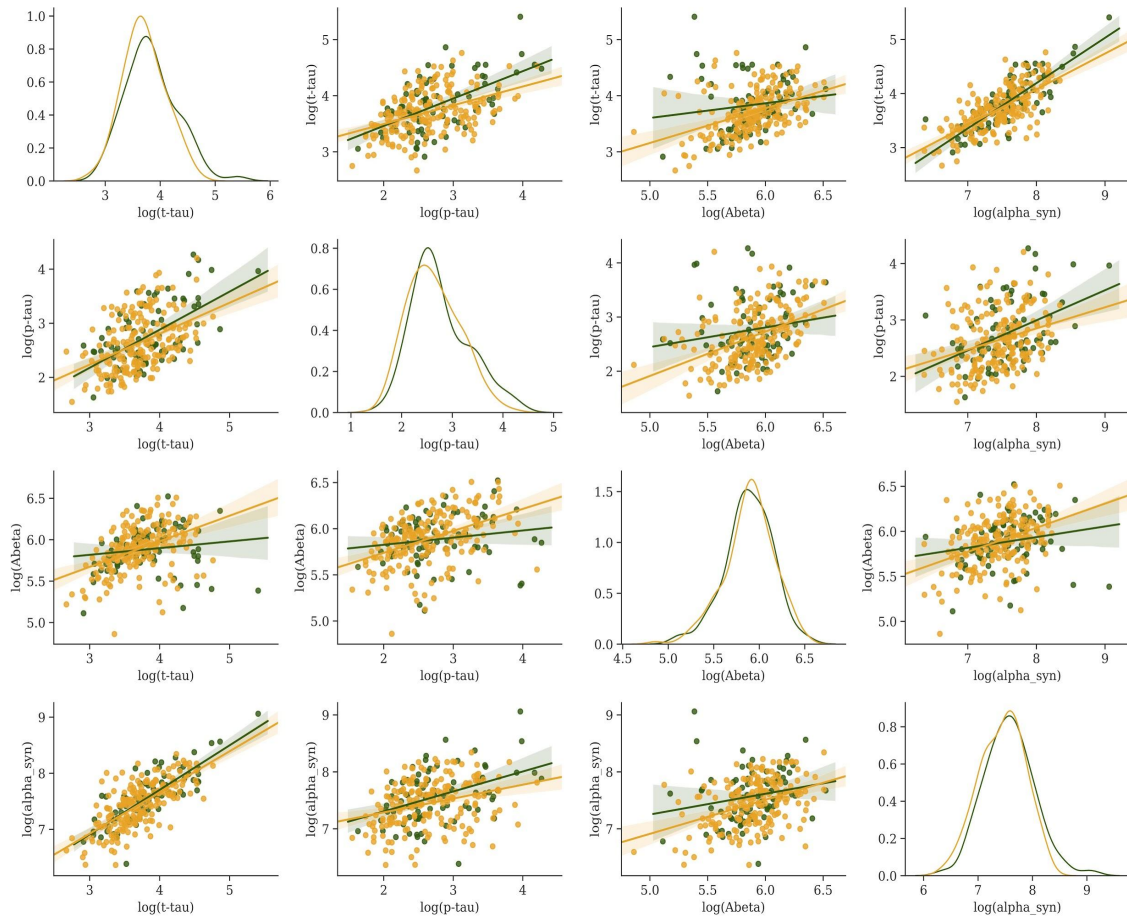

**Supplementary Figure 1: Paired plot showing correlations between pairs of CSF proteins in the PPMI dataset. The diagonal plots represent the CSF protein histogram. Orange: PD, Green: HC**

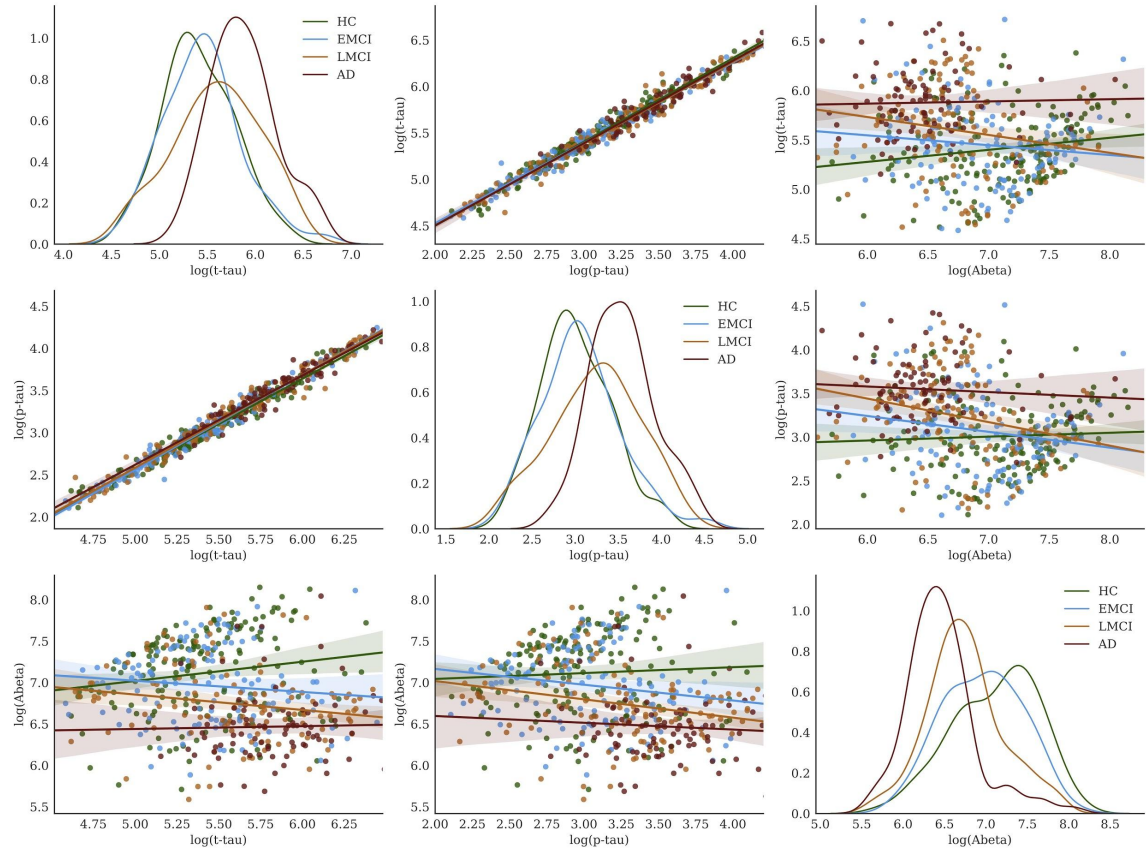

**Supplementary Figure 2: Paired plot showing correlations between pairs of CSF proteins in the ADNI dataset. The diagonal plots represent the CSF protein histograms in each group.**

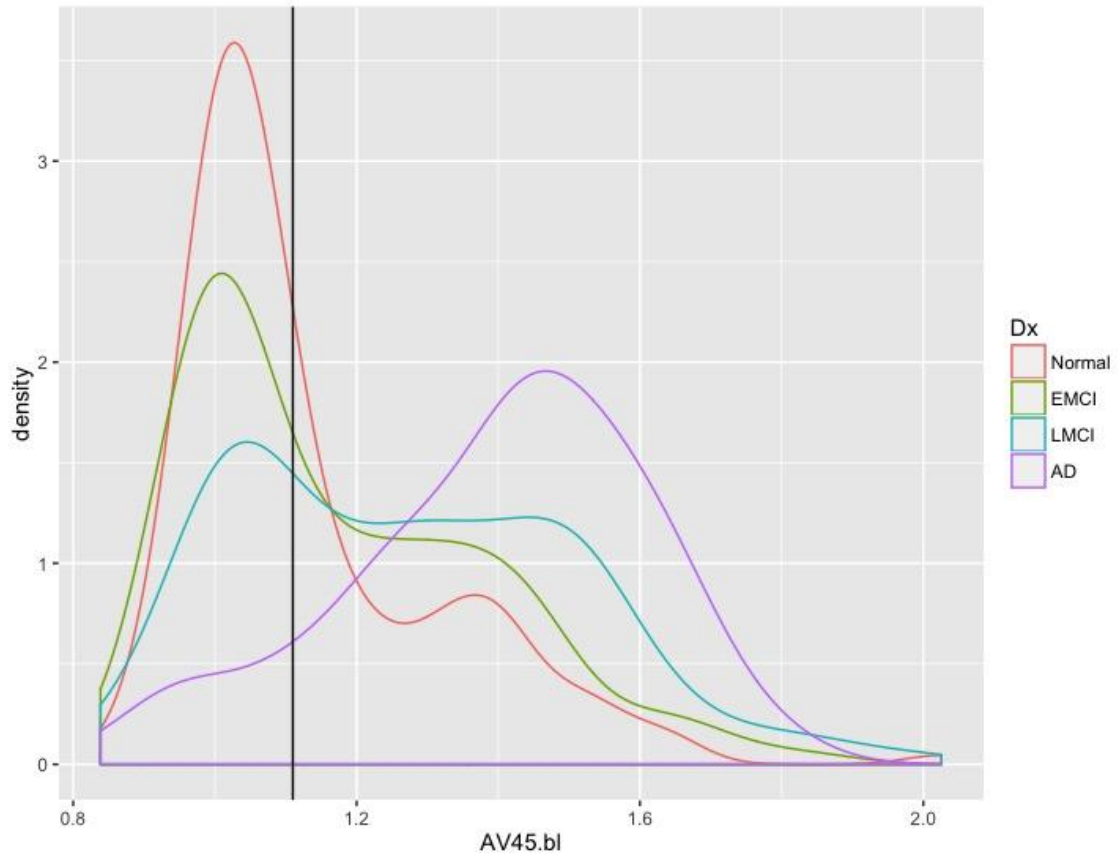

**Supplementary Figure 3:** florbetapir (AV45) SUVR density histograms at baseline for normal, EMCI, LMCI, and AD groups. We used  $SUVR \geq 1.11$  (the vertical line) as the threshold for positive amyloid- $\beta$ .
